# Supplementary material for: Two New Components from an Association of Marine Sponges Poecillastra sp. and Jaspis sp. and Their Inhibitory Effects on Biomarkers for Benign Prostatic Hyperplasia
Source: MDPI journal article supplement (doi:10.3390/md21090491), 2023-09-14
Supplement: s1 [file s1]

# Two New Components from an Association of Marine Sponges *Poecillastra* sp. and *Jaspis* sp. and Their Inhibitory Effects on Biomarkers for Benign Prostatic Hyperplasia

Buyng Su Hwang <sup>1</sup>, Sangbum Lee <sup>2</sup>, Eun Ju Jeong <sup>3,\*</sup> and Jung-Rae Rho <sup>2,\*</sup>

<sup>1</sup> Bio-Resource Industrialization Center, Nakdonggang National Institute of Biological Resources, Sangju 37242, Republic of Korea

<sup>2</sup> Department of Oceanography, Kunsan National University, Kunsan 54150, Republic of Korea

<sup>3</sup> Department of Plant & Biomaterials Science, Gyeongsang National University, Jinju 52725, Republic of Korea

\* Correspondence: jeong.ej@gnu.ac.kr (E.J.J.); jrrho@kunsan.ac.kr (J.-R.R.); Tel.: +82-55-751-3224 (E.J.J.); +82-63-469-4606 (J.-R.R.)

## Contents

|                                                                                                                               |    |
|-------------------------------------------------------------------------------------------------------------------------------|----|
| Figure S1. HRESIMS for <b>1</b> .                                                                                             | 2  |
| Figure S2. The <sup>1</sup> H (A) and <sup>13</sup> C (B) NMR spectra for <b>1</b> .                                          | 3  |
| Figure S3. COSY NMR spectrum for <b>1</b> .                                                                                   | 4  |
| Figure S4. TOCSY NMR spectrum for <b>1</b> .                                                                                  | 5  |
| Figure S5. HSQC NMR spectrum for <b>1</b> (blue: CH <sub>2</sub> , black: CH <sub>3</sub> + CH).                              | 6  |
| Figure S6. HMBC NMR spectrum for <b>1</b> ( <sup>n</sup> J <sub>CH</sub> = 6 Hz).                                             | 7  |
| Figure S7. NOESY NMR spectrum for <b>1</b> .                                                                                  | 8  |
| Figure S8. Expanded HETLOC NMR spectrum for <b>1</b> .                                                                        | 9  |
| Figure S9. HRESIMS (A) and MSMS (B) data for <b>2</b> .                                                                       | 10 |
| Figure S10. The <sup>1</sup> H (A) and <sup>13</sup> C (B) NMR spectra for <b>2</b> .                                         | 11 |
| Figure S11. DQFCOSY NMR spectra for <b>2</b> .                                                                                | 12 |
| Figure S12. TOCSY NMR spectra for <b>2</b> .                                                                                  | 13 |
| Figure S13. HSQC NMR spectrum for <b>2</b> (blue: CH <sub>2</sub> , black: CH <sub>3</sub> + CH).                             | 14 |
| Figure S14. HSQC-TOCSY NMR spectrum for <b>2</b> (blue: <sup>1</sup> J <sub>CH</sub> , black: <sup>n</sup> J <sub>CH</sub> ). | 15 |
| Figure S15. HMBC NMR spectrum for <b>2</b> ( <sup>n</sup> J <sub>CH</sub> = 8 Hz).                                            | 16 |
| Figure S16. NOESY (up) and NOESY 1D (down) NMR spectrum for <b>2</b> .                                                        | 17 |
| Figure S17. Expanded HECADE NMR spectrum for <b>2</b> .                                                                       | 18 |

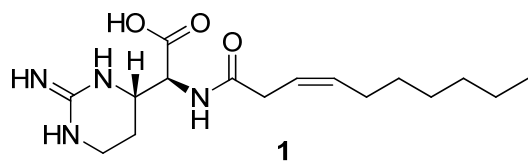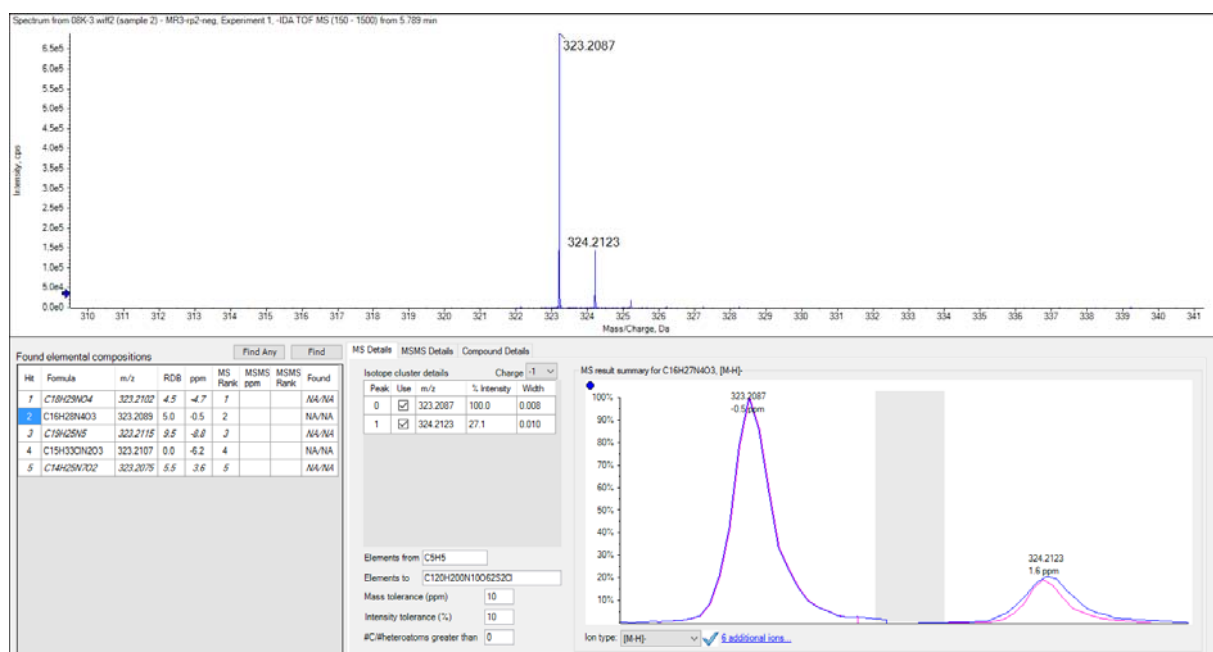

Figure S1. HR ESI MS data for **1**.

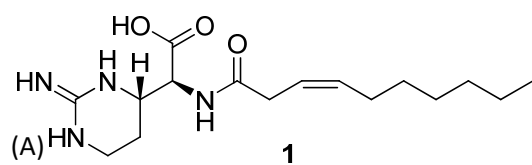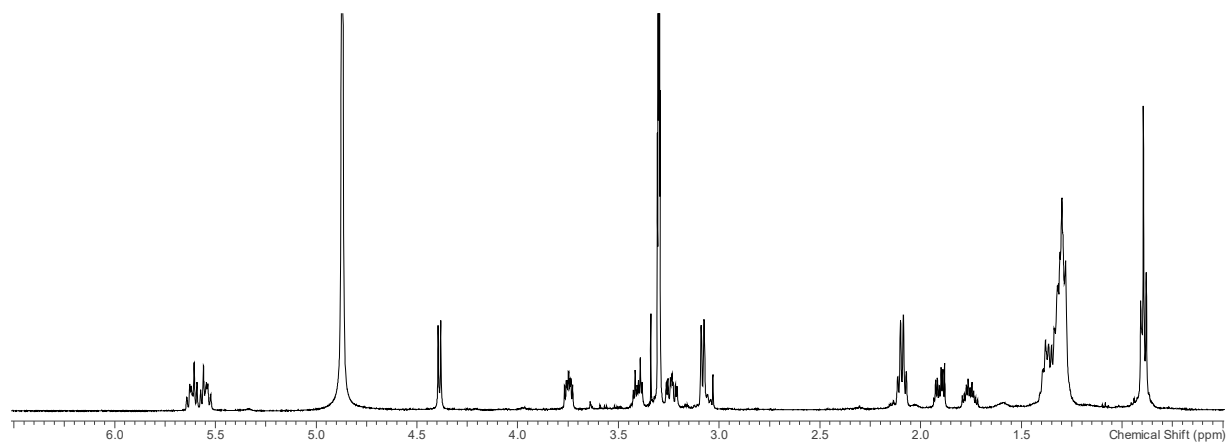

(B)

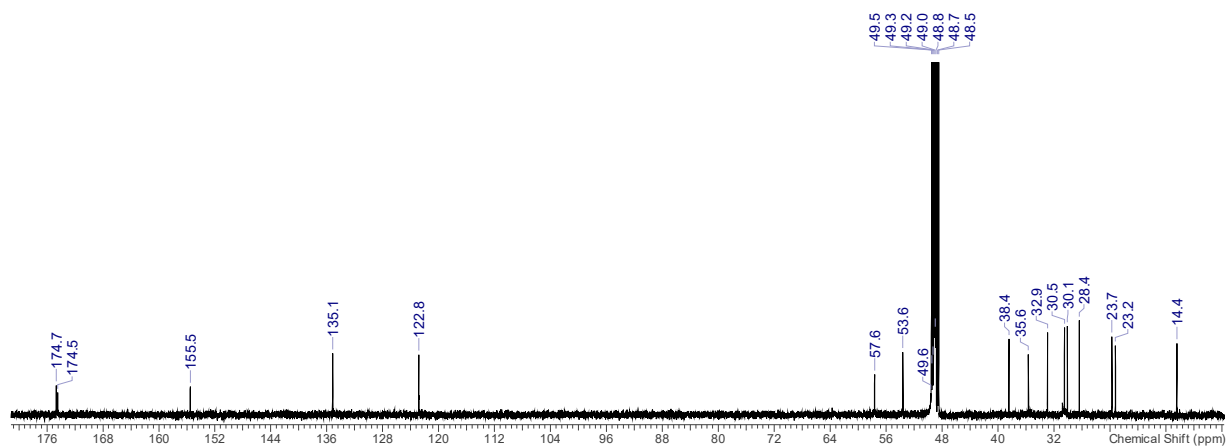

Figure S2. The  $^1\text{H}$  (A) and  $^{13}\text{C}$  (B) NMR spectra for **1**.

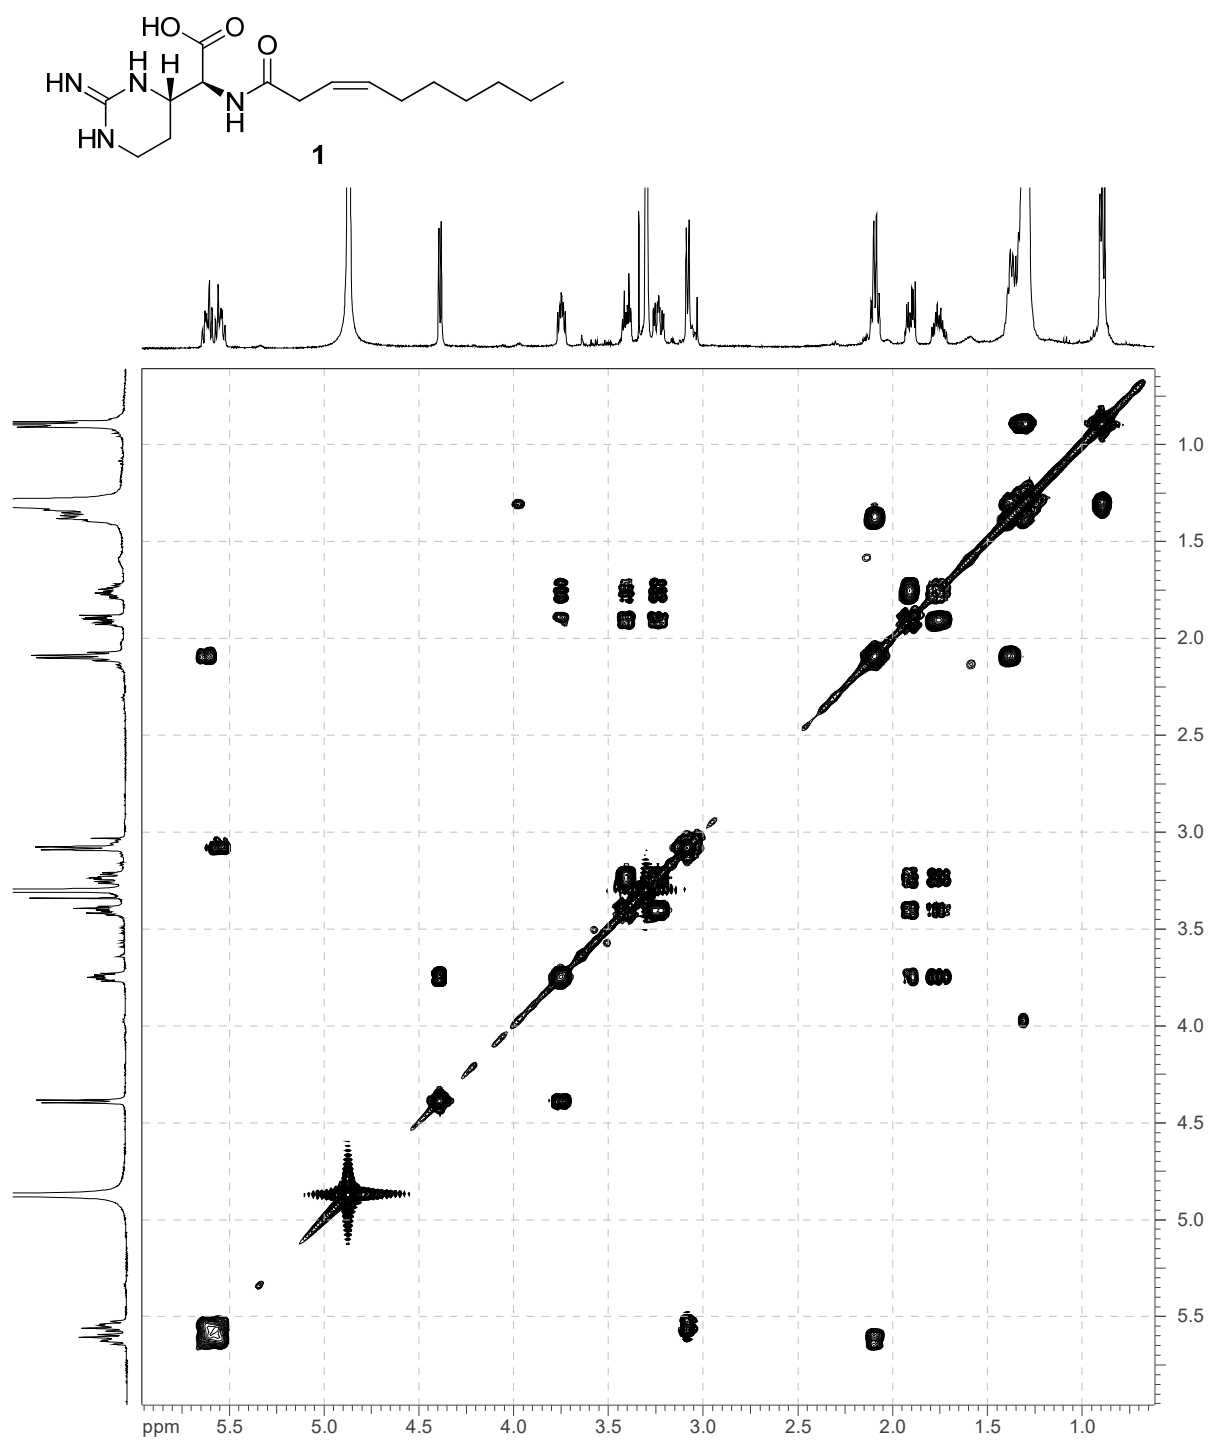

Figure S3. COSY NMR spectrum for **1**.

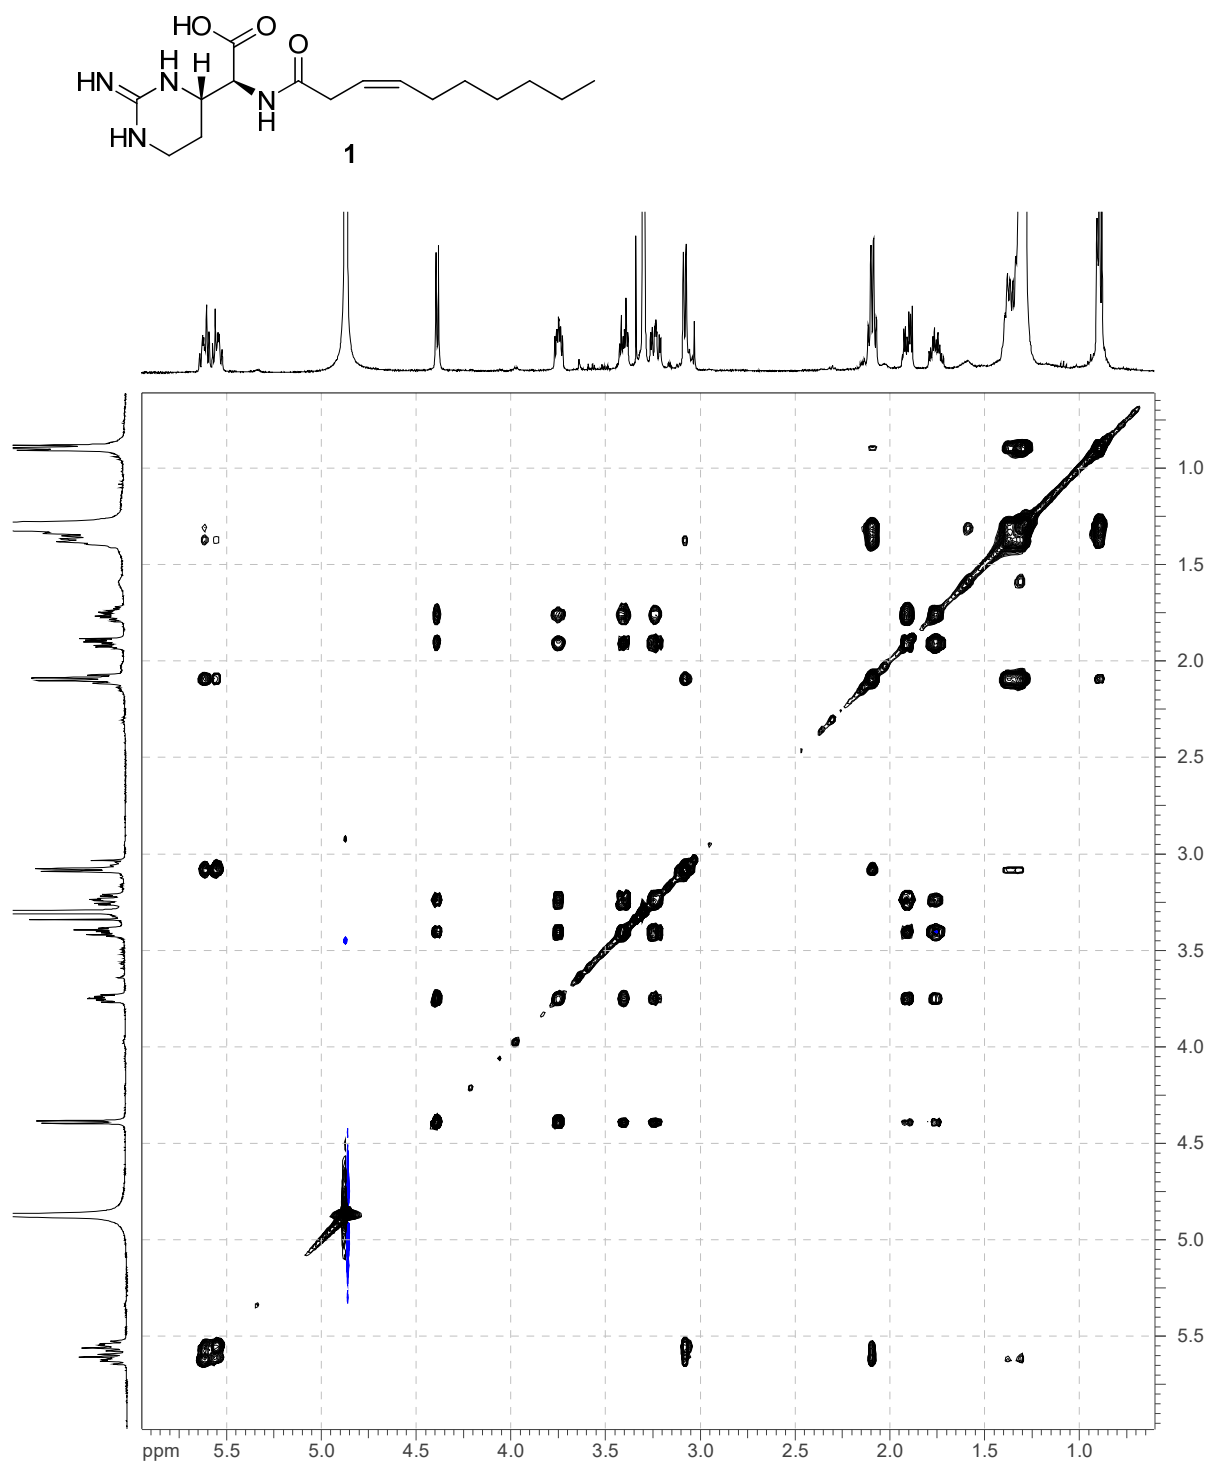

Figure S4. TOCSY NMR spectrum for **1**.

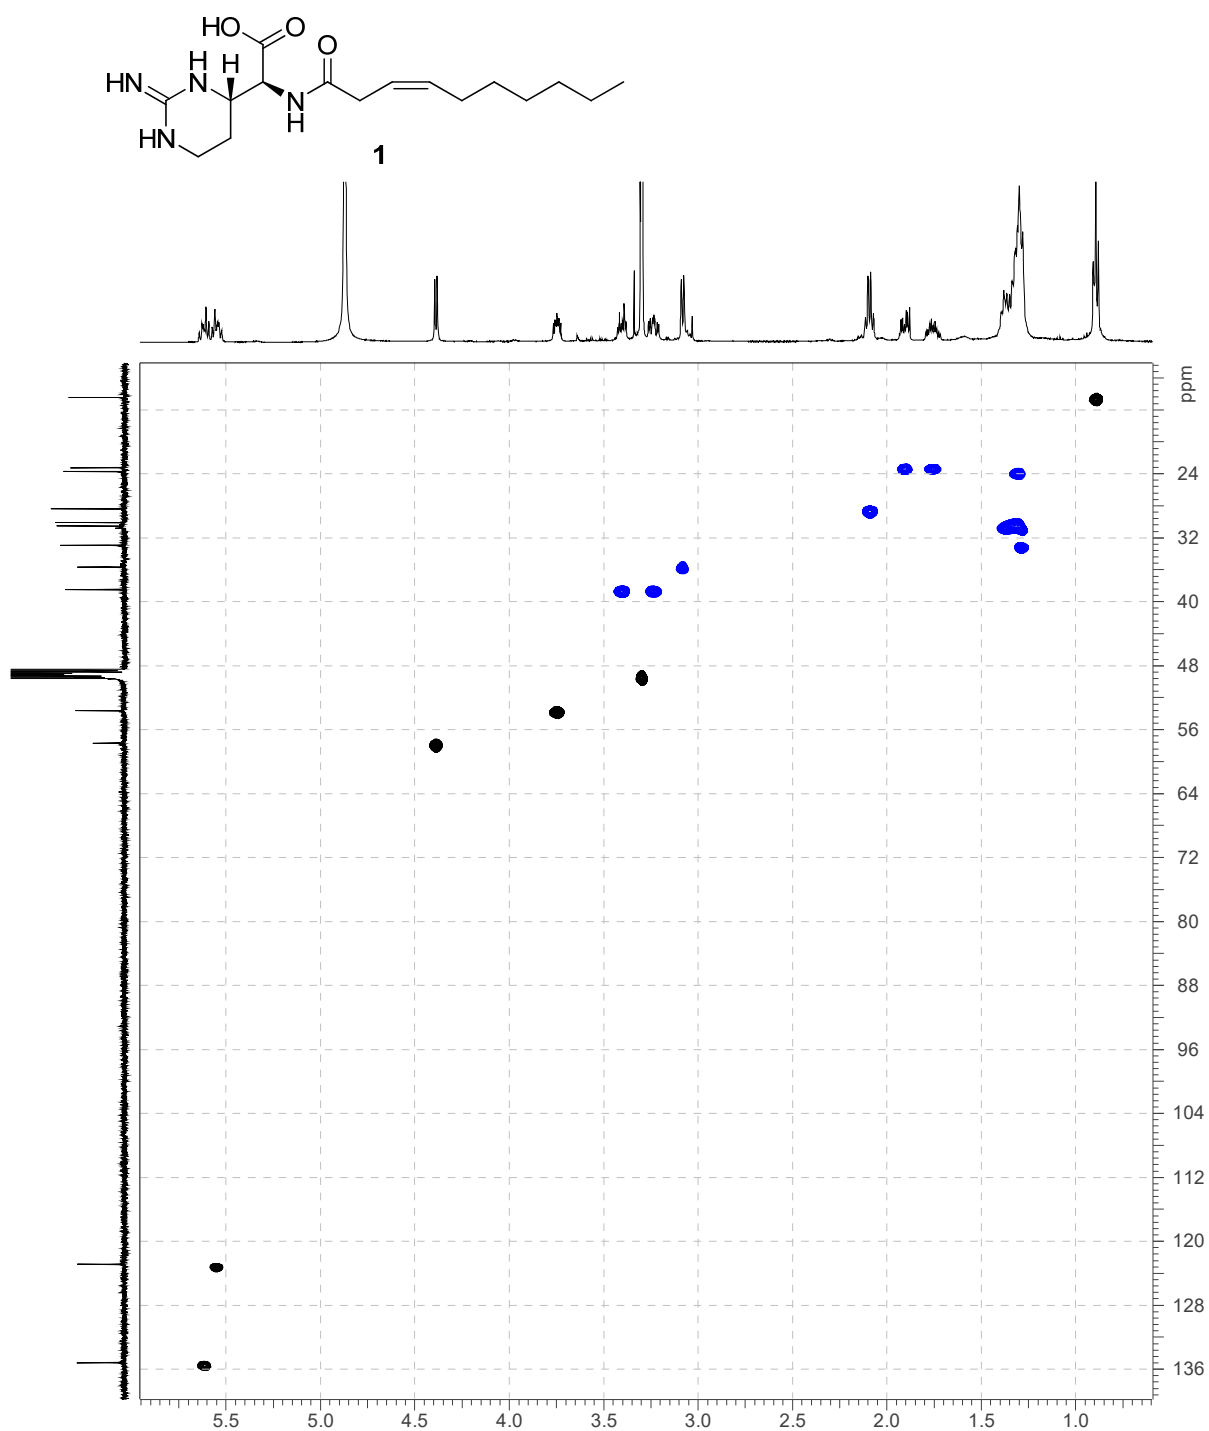

Figure S5. HSQC NMR spectrum for **1** (blue: CH<sub>2</sub>, black: CH<sub>3</sub> + CH).

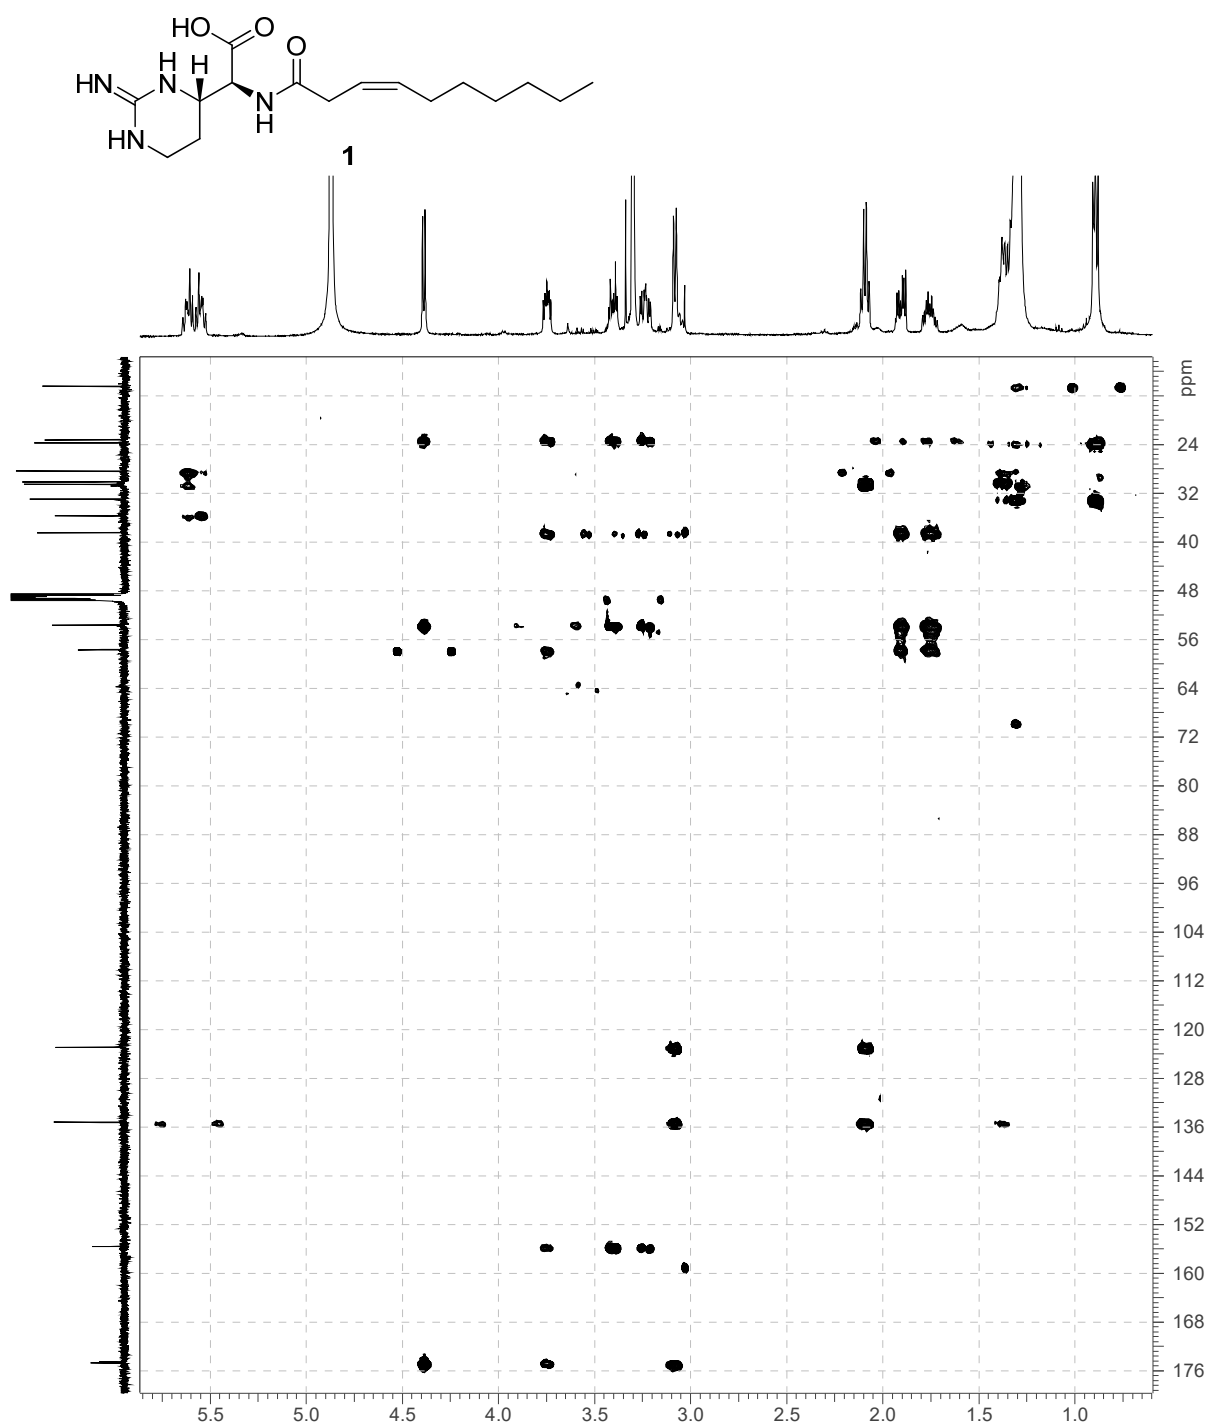

Figure S6. HMBC NMR spectrum for **1** ( $^nJ_{CH} = 6$  Hz).

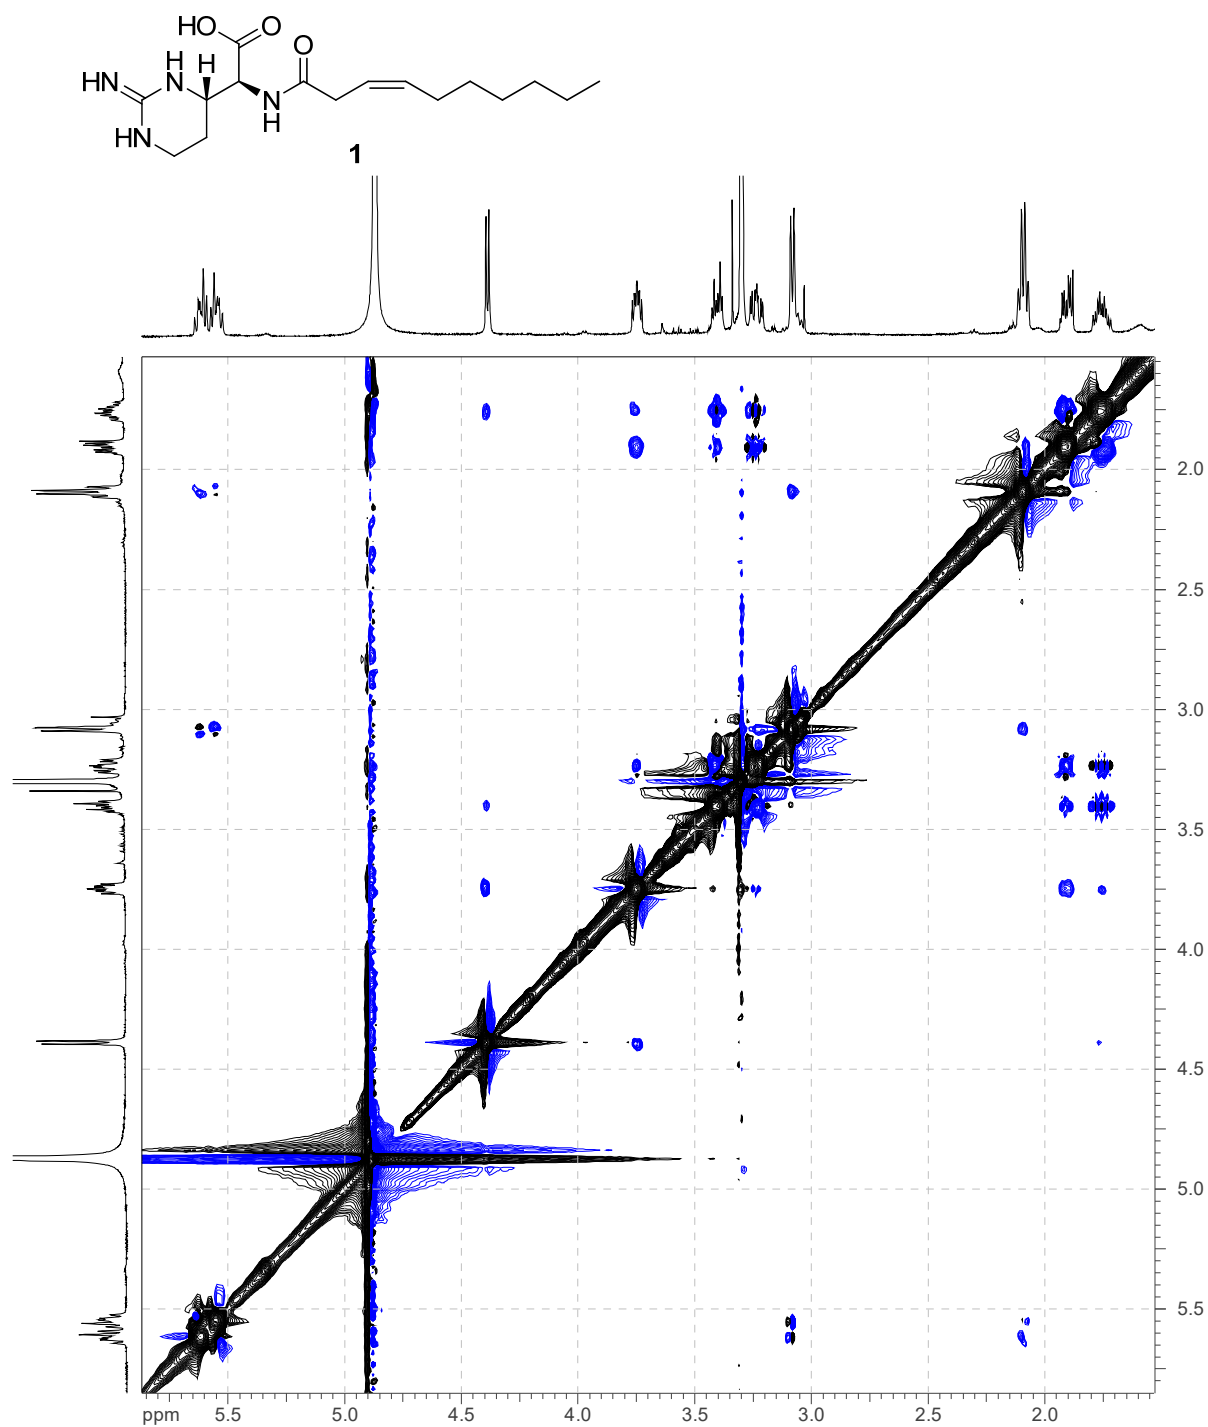

Figure S7. NOESY NMR spectrum for **1**.

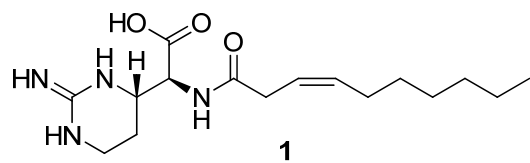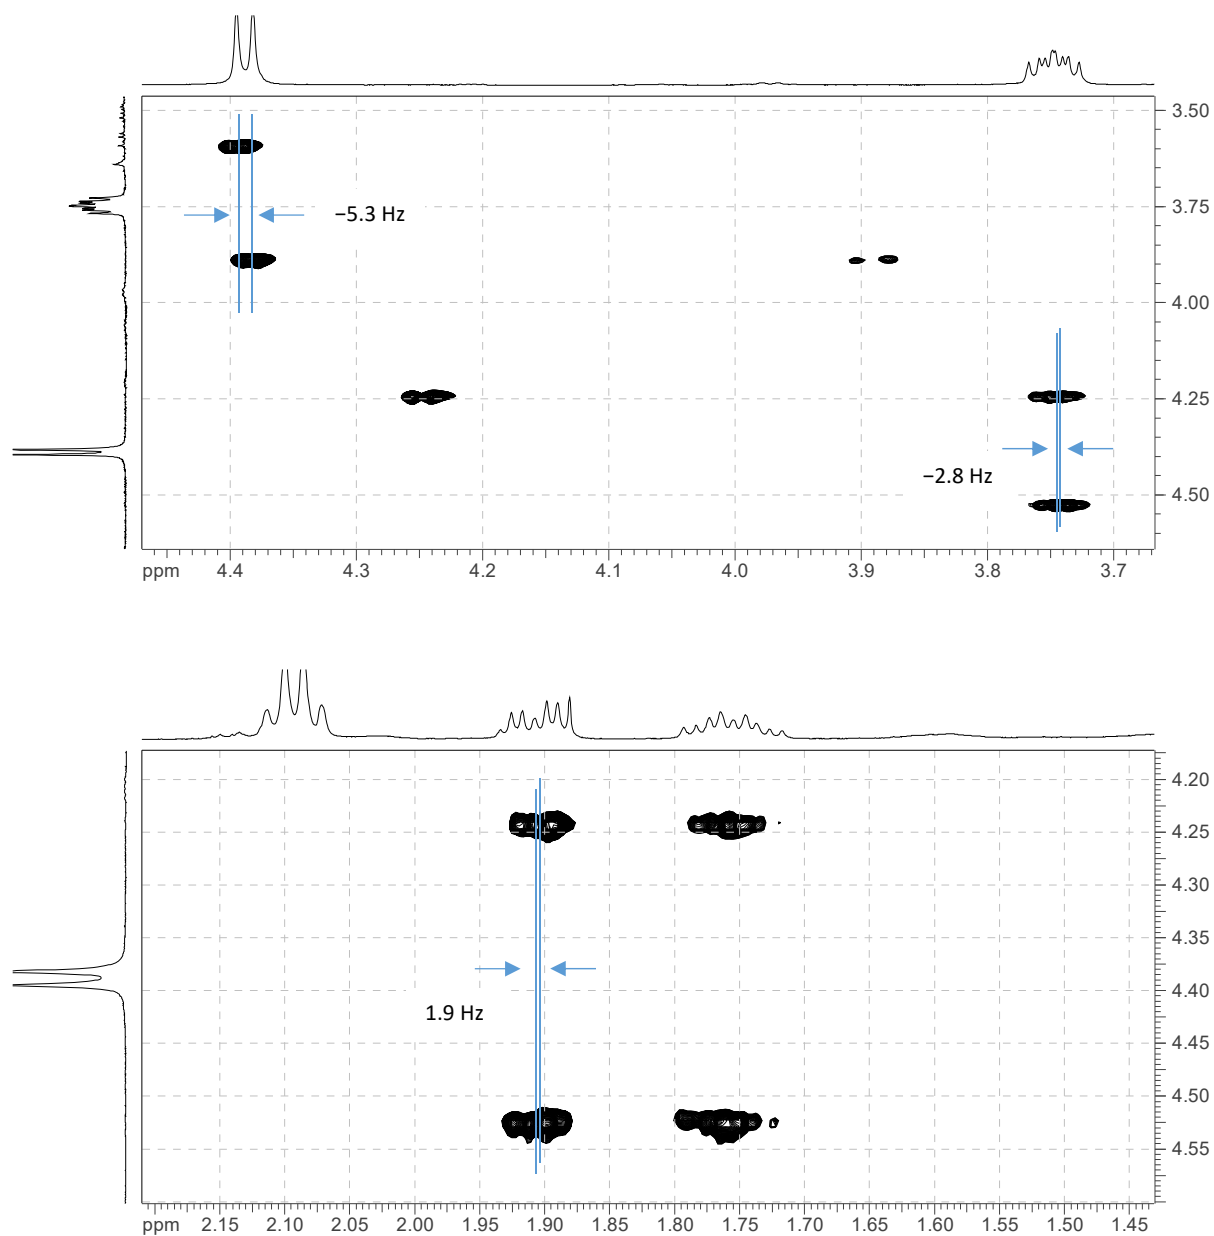

Figure S8. Expanded HETLOC NMR spectrum for **1**.

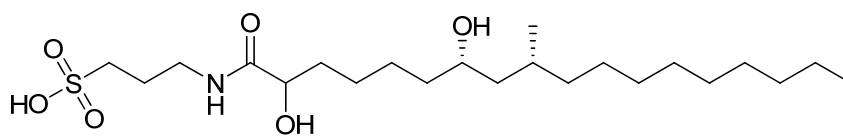

**2**

(A)

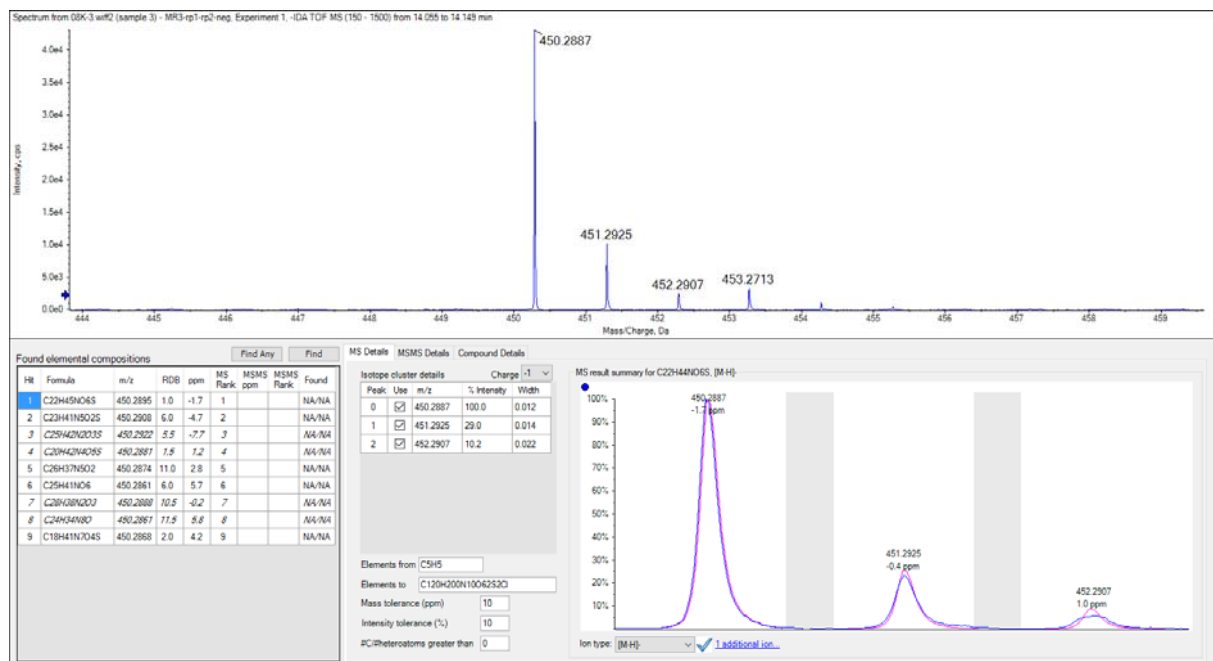

(B)

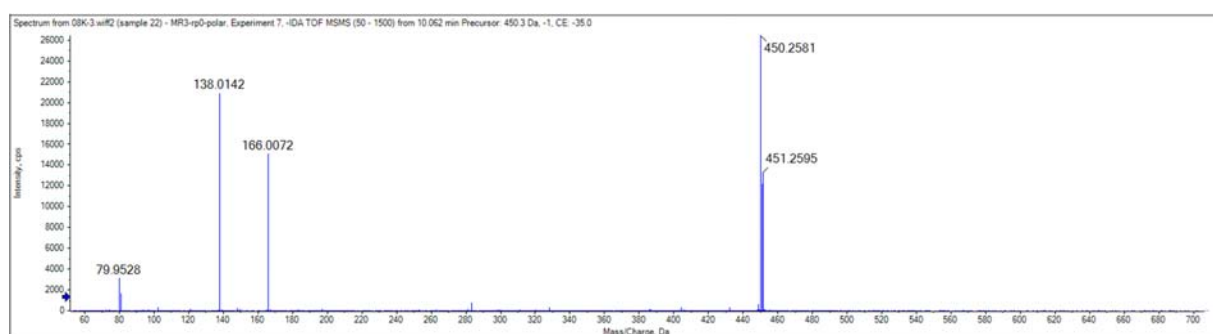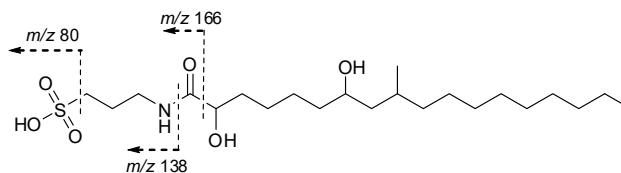

Figure S9. HRESIMS (A) and MSMS (B) data for **2**.

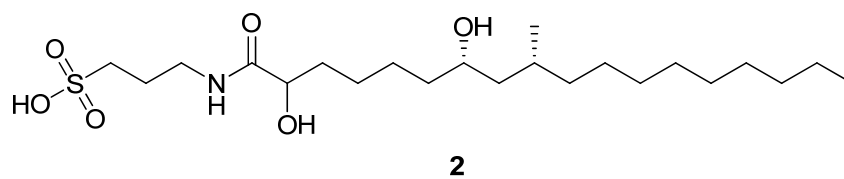

(A)

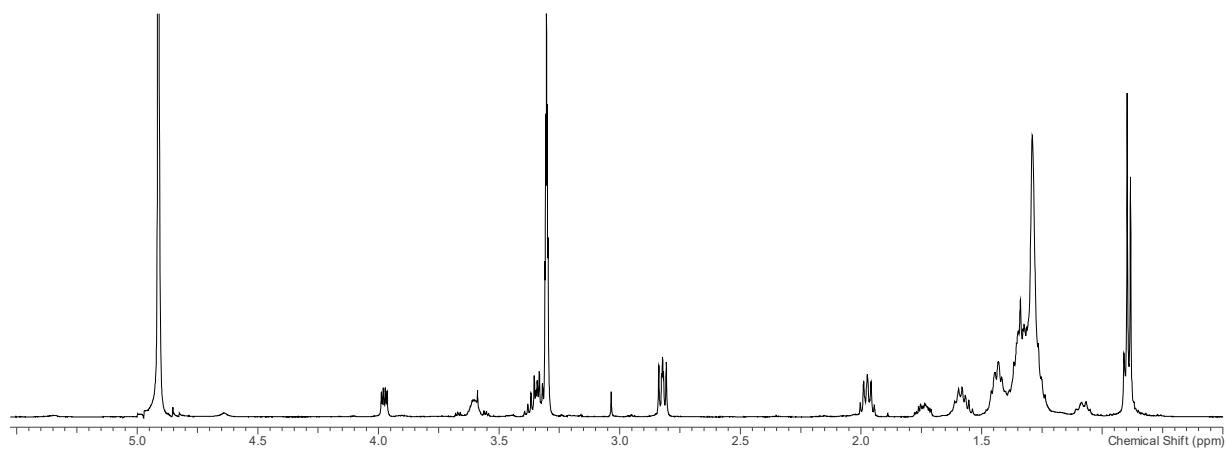

(B)

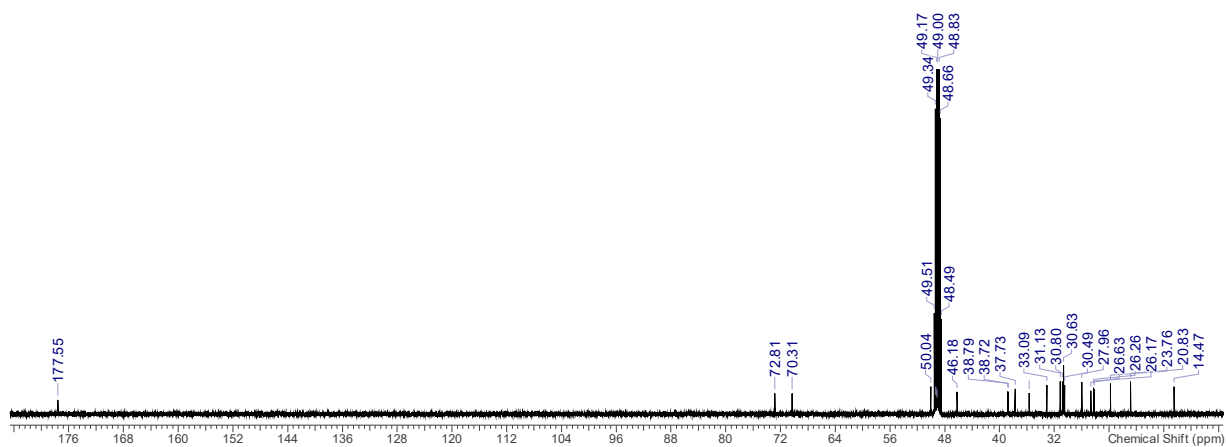

Figure S10. The <sup>1</sup>H (A) and <sup>13</sup>C (B) NMR spectra for **2**.

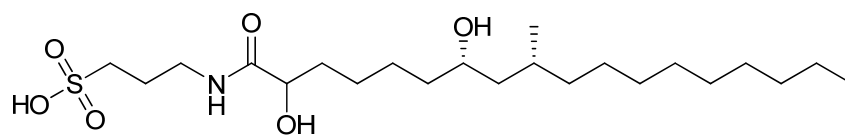

**2**

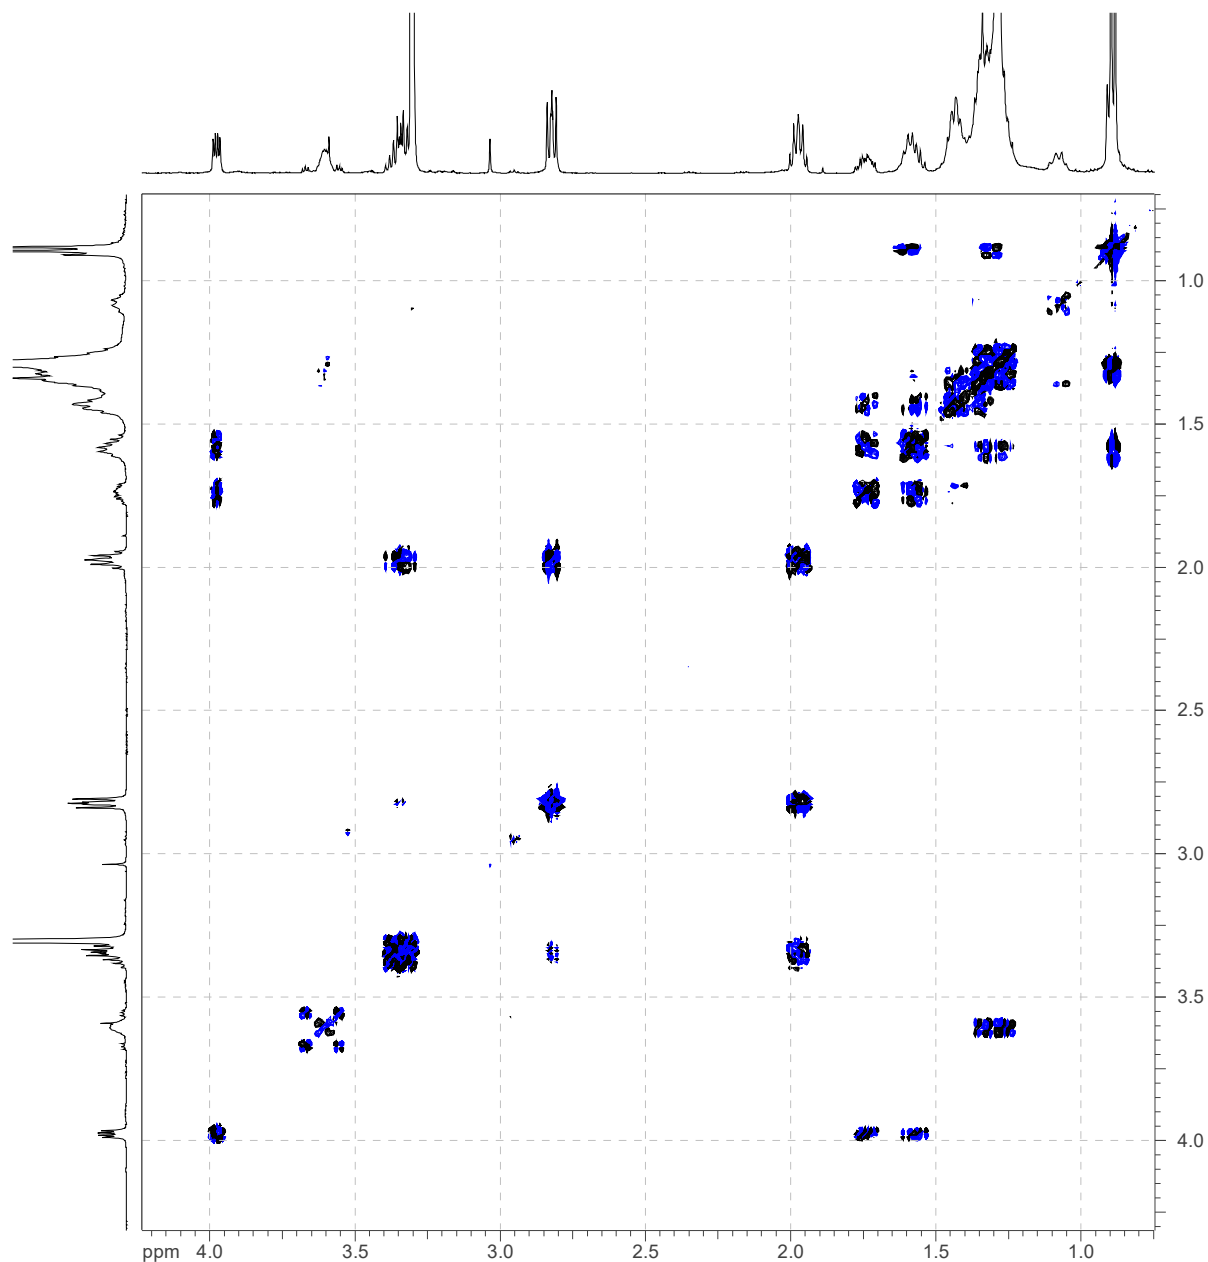

Figure S11. DQFCOSY NMR spectra for **2**.

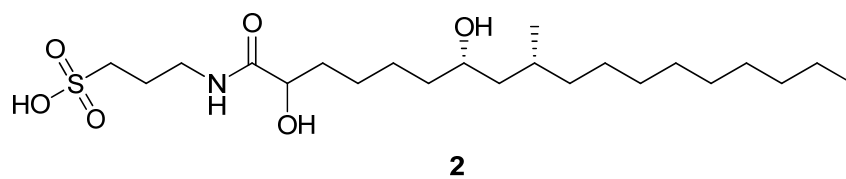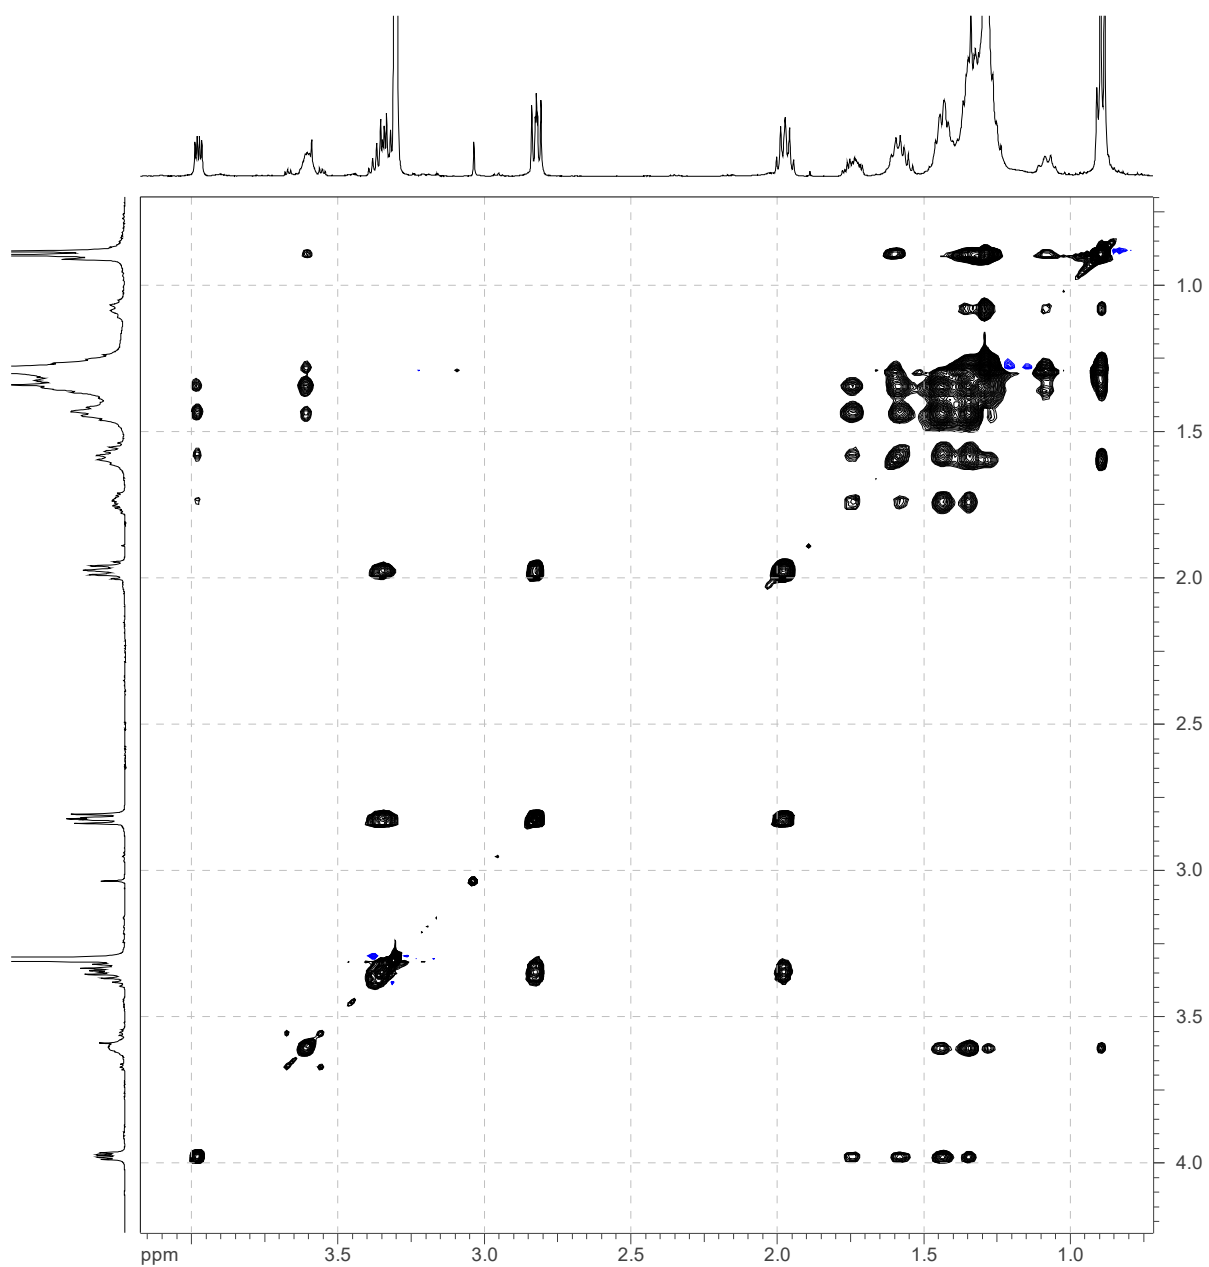

Figure S12. TOCSY NMR spectra for **2**.

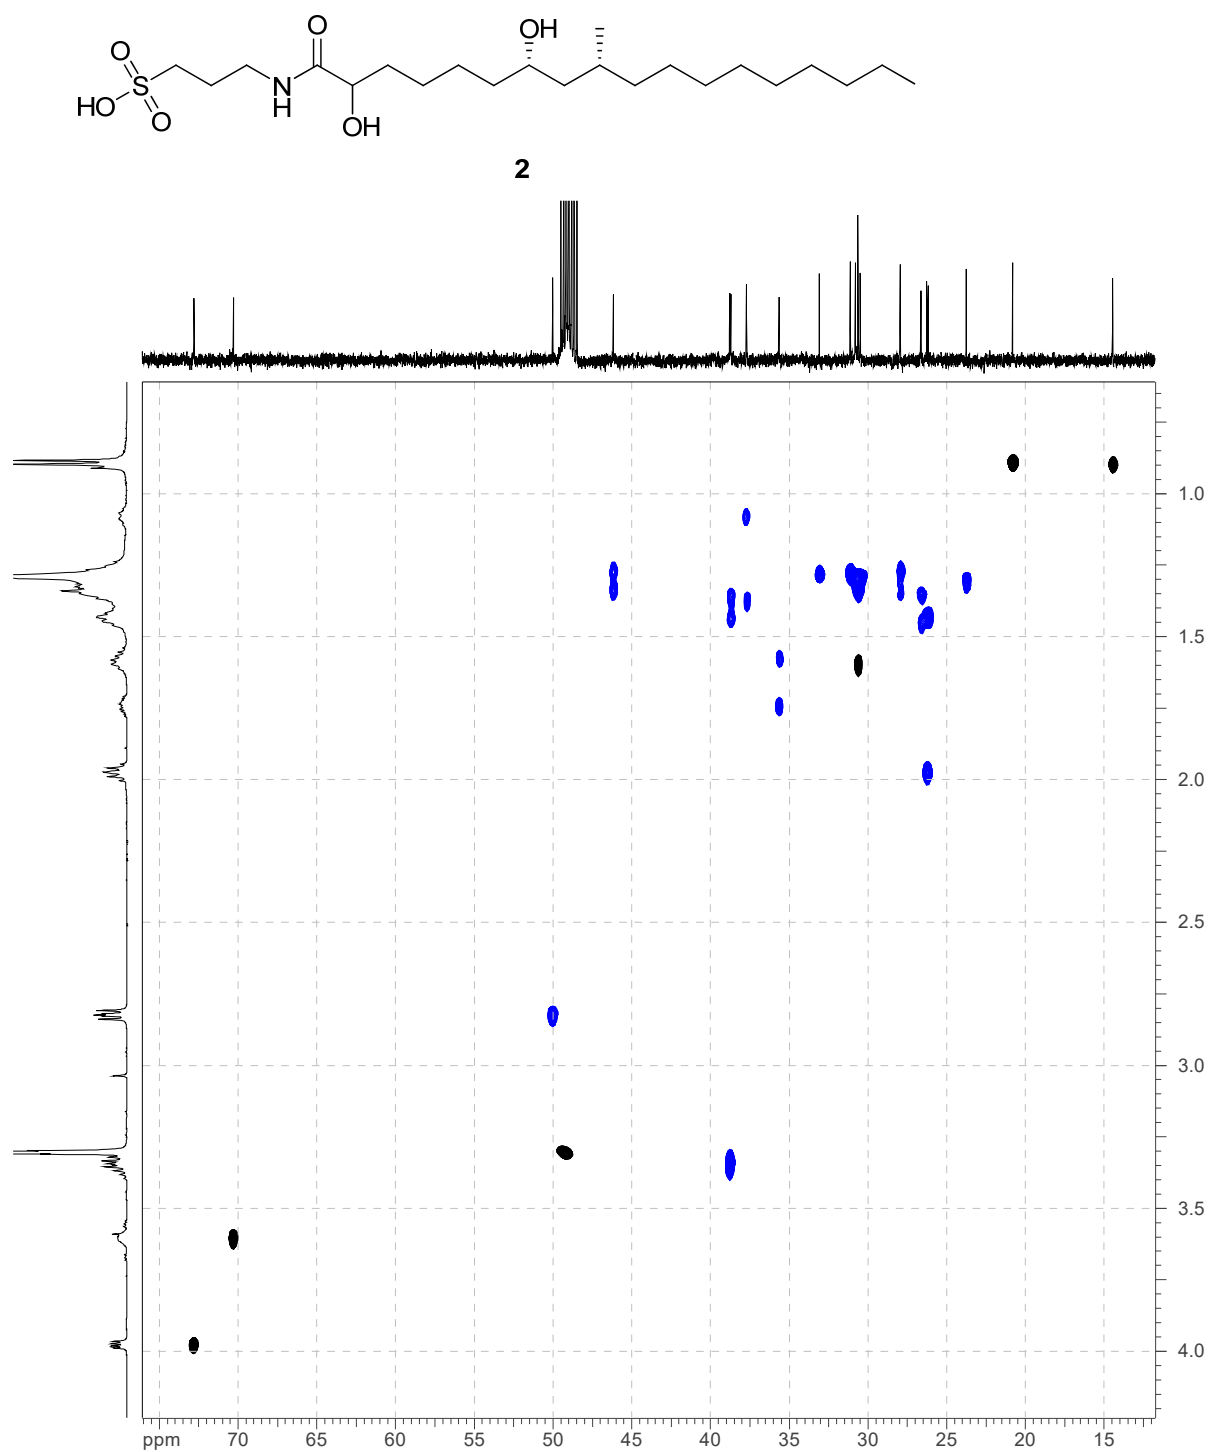

Figure S13. HSQC NMR spectrum for **2** (blue: CH<sub>2</sub>, black: CH<sub>3</sub> + CH).

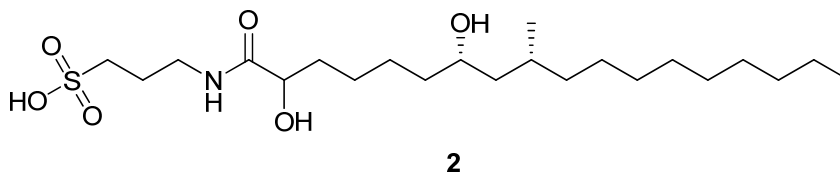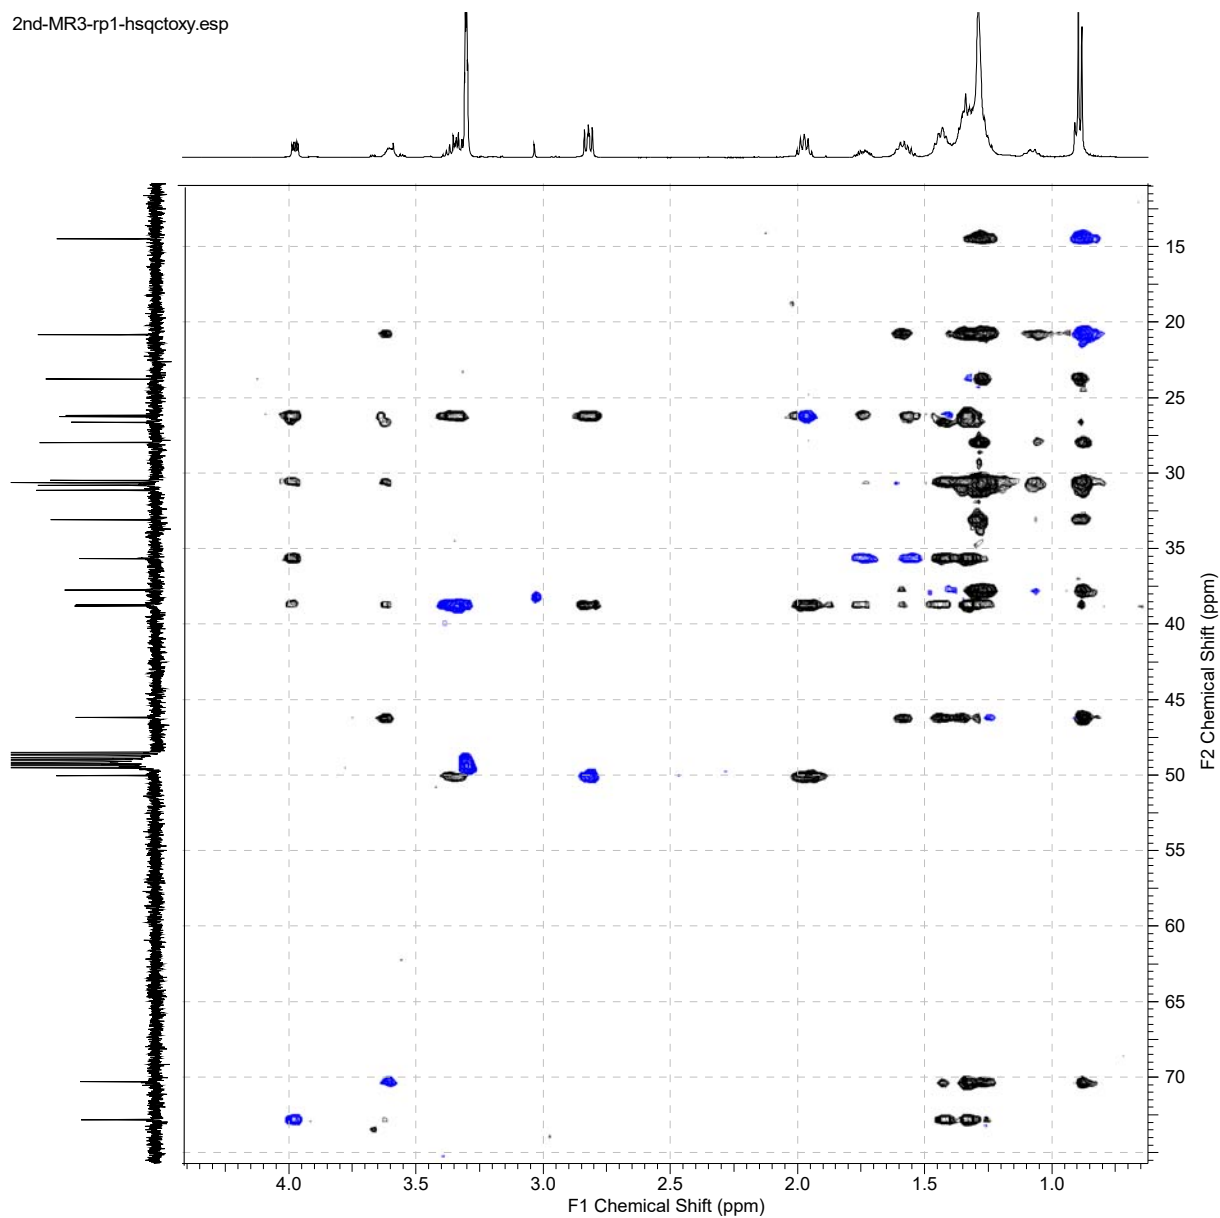

Figure S14. HSQC-TOCSY NMR spectrum for **2** (blue:  $^1J_{\text{CH}}$ , black:  $^nJ_{\text{CH}}$ ).

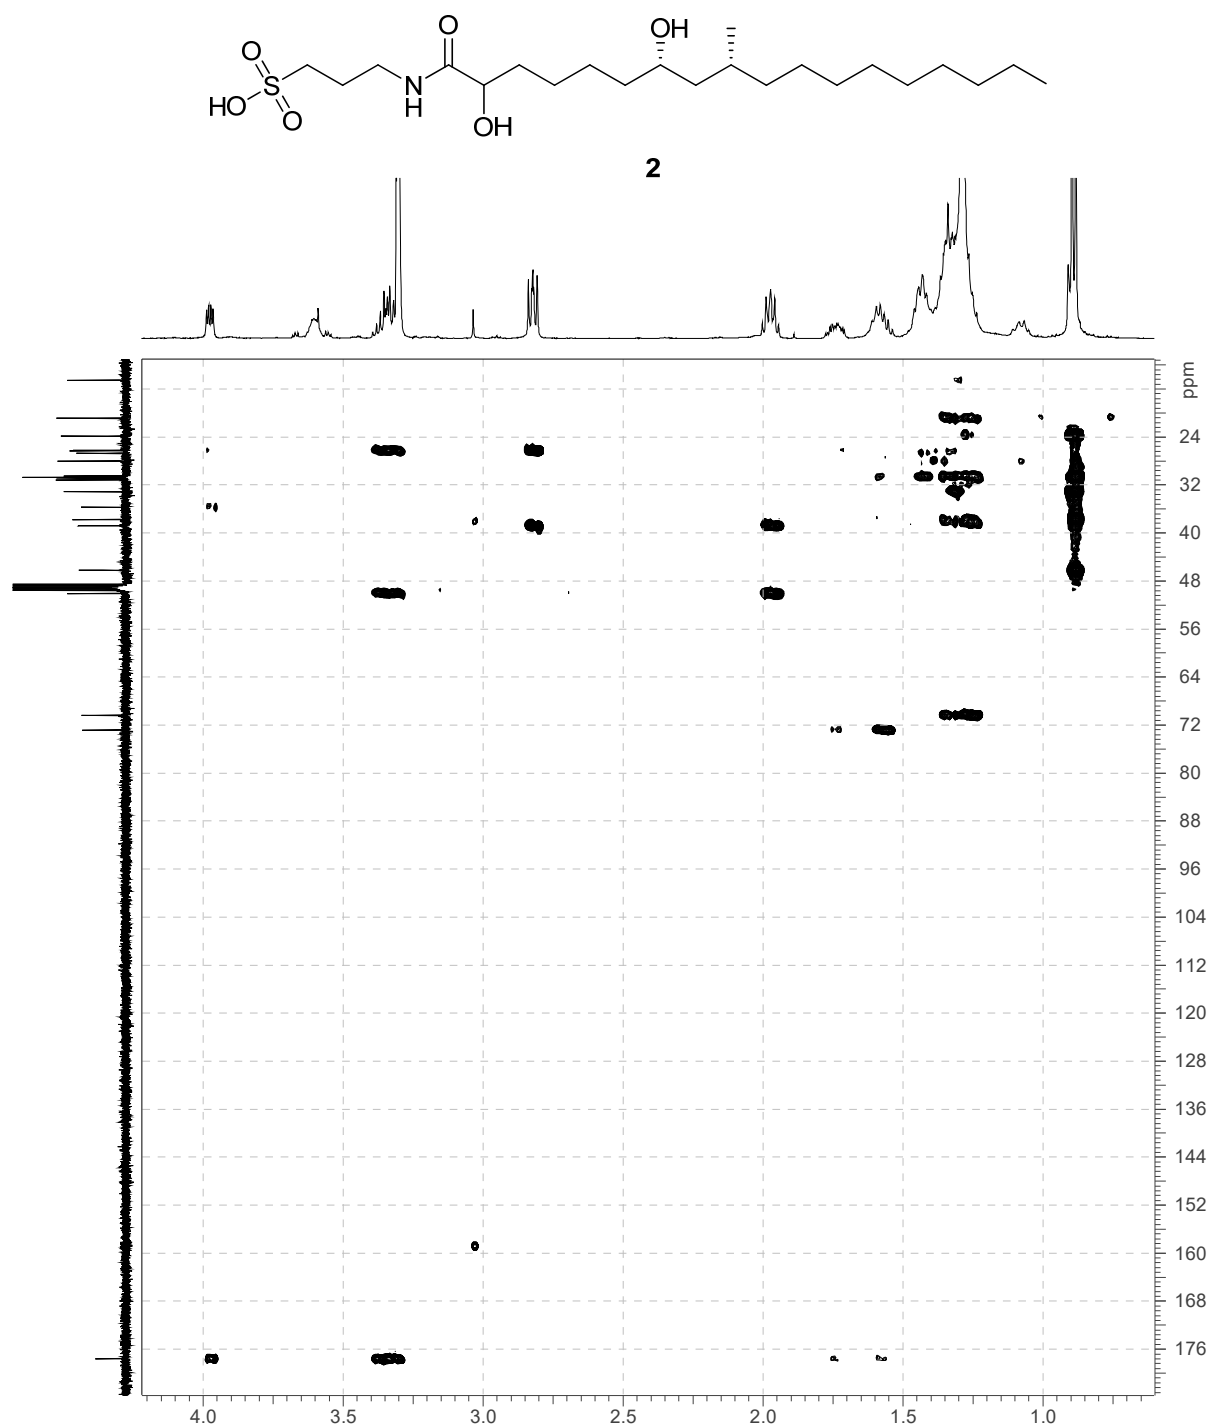

Figure S15. HMBC NMR spectrum for **2** ( $^nJ_{CH} = 8$  Hz).

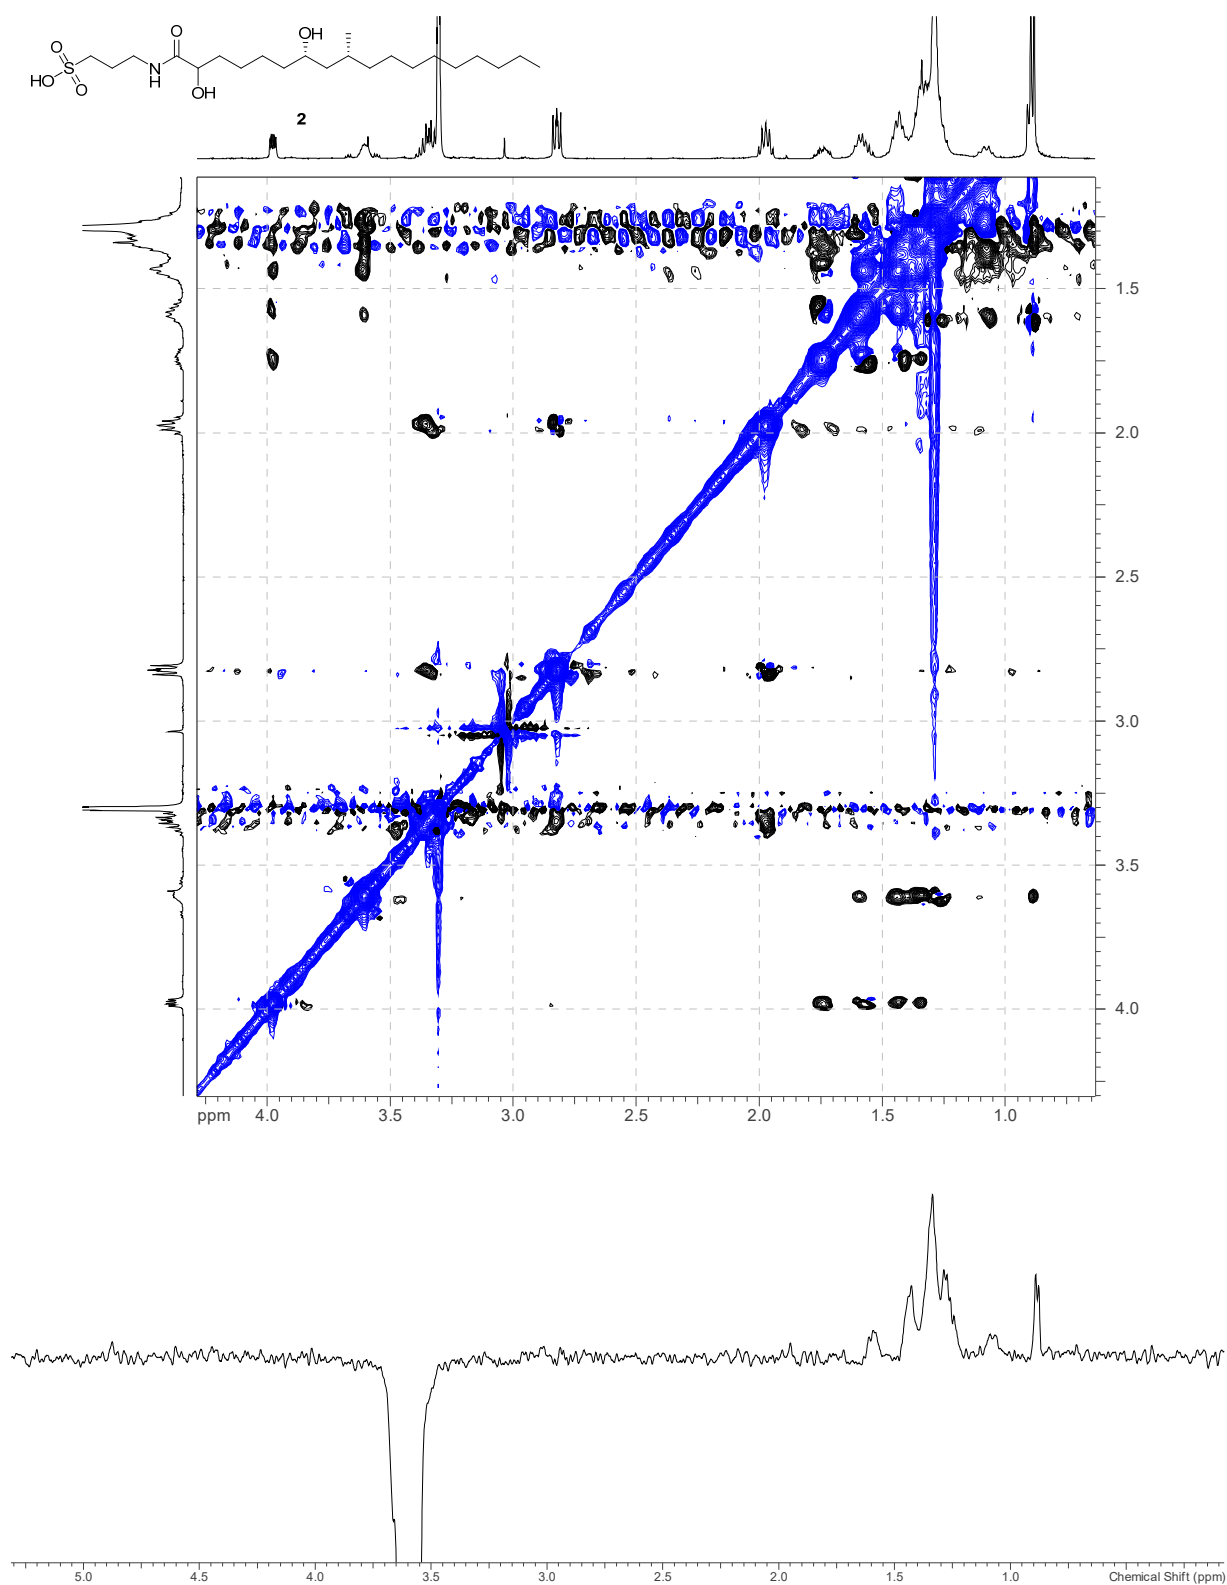

Figure S16. NOESY(up) and NOESY 1D (down) NMR spectrum for **2**.

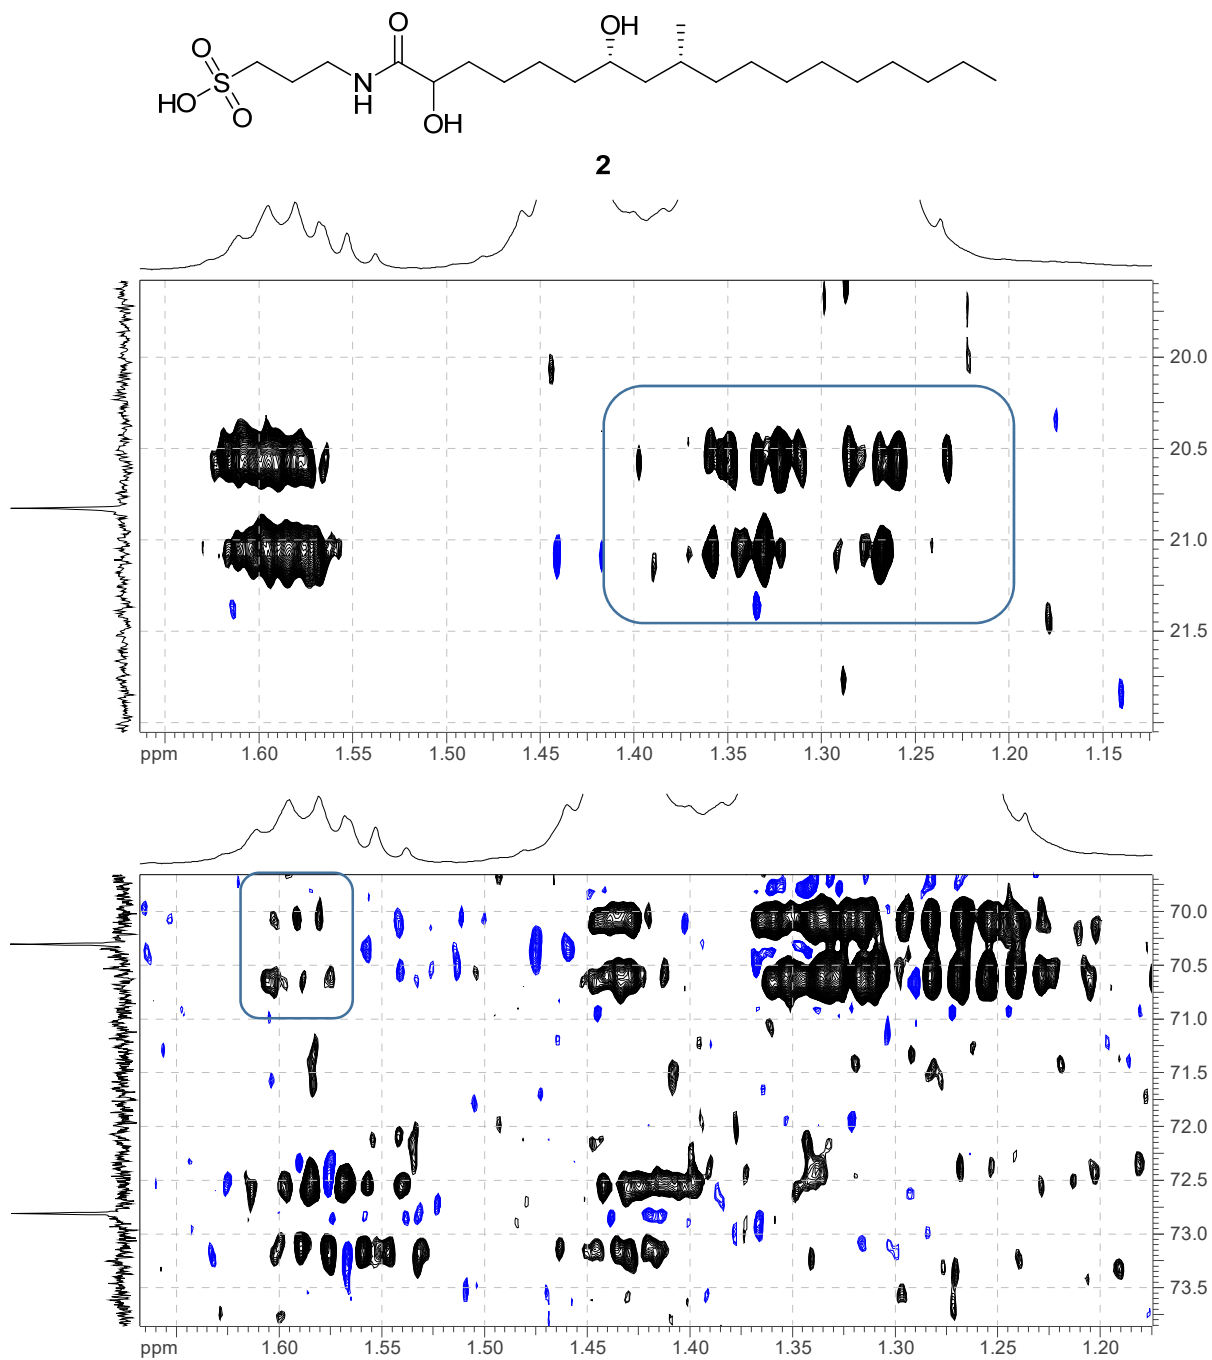

Figure S17. Expanded HECAD NMR spectrum for **2**.

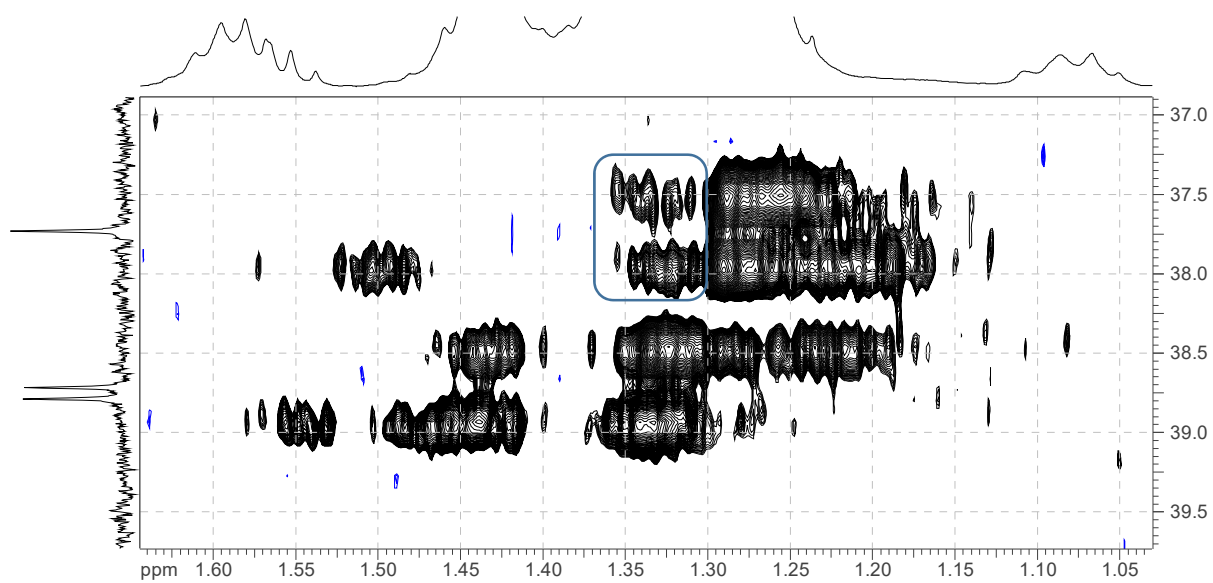

Figure S17 (Continued). Expanded HECAD NMR spectrum for **2**.
